# Supplementary material for: Stress-Induced Nuclear Import Governs Transcription Recovery after DNA Damage
Source: Research Square preprint supplement (doi:10.21203/rs.3.rs-7241921/v1), 2025-08-12
Supplement: Supplementary file 1 [file d458712f62373d408d2bcdca.docx]

***KEY RESOURCES TABLE***

| **REAGENT or RESOURCE** | **SOURCE** | **IDENTIFIER** |
| --- | --- | --- |
| **Antibodies** | | |
| 6-4PP (IF 1/500) | Cosmo Bio | RRID:AB_1962842 |
| EXD2 (IF 1/500, WB 1/2000, PLA 1/500) | Abcam | RRID:AB_11127277 |
| RNAPII (PLA 1/10000) | Active Motif | RRID:AB_2732926 |
| XPC (WB 1/1000) | Bethyl | RRID:AB_2288476 |
| CSB (WB 1/500) | GeneTex | RRID:AB_1950219 |
| H3 (WB 1/2000) | Abcam | RRID:AB_302613 |
| GFP (PLA 1/500, IF 1/1000) | Torrey Pines Biolabs | RRID:AB_2313770 |
|  tubulin (IF 1/1000) | Abcam | RRID:AB_10672056 |
| Actin b (WB 1/1000) | IGBMC Antibody Facility | 2D7 |
| Peroxidase-conjugated AffiniPure Donkey Anti-Mouse IgG (WB 1/10000) | Jackson Immuno Research | RRID:AB_2340771 |
| Peroxidase-conjugated AffiniPure Goat Anti-Rabbit IgG (WB 1/10000) | Jackson Immuno Research | RRID:AB_2307391 |
| Alexa Fluor 488 goat anti mouse IgG (IF 1/500) | Invitrogen | RRID:AB_2534069 |
| Alexa Fluor 488 donkey anti rabbit IgG (IF 1/500) | Invitrogen | RRID:AB_2535792 |
| Alexa Fluor 488 goat anti chicken IgG (IF 1/500) | Invitrogen | RRID:AB_2534096 |
| **siRNA** | | |
| XPC siRNA | Dharmacon | L-016040-00 |
| CSB siRNA | Dharmacon | L-004888-00 |
| Control siRNA | Dharmacon | D-001810-10 |
| **Chemicals** | | |
| Paraformaldehyde 16% | Electron Microscopy Sciences | 15710 |
| Crystal violet solution | Sigma-Aldrich | V5265 |
| Ivermectin | Thermo Scientific Chemicals | J62777 |
| INI-43 | MedChemExpress | HY-121607 |
| Importazole | MedChemExpress | HY-101091 |
| Spironolactone | Santa Cruz | sc-204294 |
| ActinomycineD | Sigma-Aldrich | A1410 |
| MitoTrackerTM Red CMXRos | Invitrogen | M7512 |
| DAPI | Sigma-Aldrich | D9542 |
| Triton X-100 | Sigma-Aldrich | T8787 |
| Tween 20 | Sigma-Aldrich | P2287 |
| SDS 20% | Euromedex | EU0660 |
| **Commercial Assays** | | |
| Click-iT RNA Alexa FluorTM 488 | Invitrogen | C10329 |
| Duolink® In Situ PLA® Probe anti-Mouse MINUS | Sigma-Aldrich | DUO92004 |
| Duolink® In Situ PLA® Probe anti-Rabbit PLUS | Sigma-Aldrich | DUO92002 |
| Duolink® In Situ Detection Reagents Red | Sigma-Aldrich | DUO92008 |
| ProLong Gold Antifade Mountant | Invitrogen | P36930 |
| PageRuler Plus Prestained Protein Ladder | Thermo Fisher | 26619 |
| Bio-Rad Protein Assay Dye Reagent Concentrate | Bio-Rad | 5000006 |
| NuPAGETM 4-12% Bis-Tris gel | Invitrogen | NP0322BOX |
| NuPAGETM MOPS SDS Running Buffer 20X | Invitrogen | NP0001 |
| NuPAGE LDS Sample Buffer 4X | Invitrogen | NP0007 |
| SuperSignal TM West Pico PLUS Chemiluminescent Substrate | Thermo Fisher | 34580 |
| Lipofectamine RNAiMAX | Invitrogen | 13778150 |
| Protease Inhibitor Cocktail | Roche | 11873580001 |
| **Experimental Models: Cell Lines** | | |
| U2OS |  | RRID:CVCL_0042 |
| U2OS GFP::EXD2 WT |  | Sandoz et al. 2023 |
| U2OS GFP::EXD2 (DMLS) clone 1 |  | This study |
| U2OS GFP::EXD2 (DMLS) clone 1 |  | This study |
| Hela EXD2 +/+ |  | RRID:CVCL_0030 |
| Hela EXD2 -/- |  | Nieminuszczy et  al., 2019 |
| Hela EXD2 -/- + flag-EXD2 WT |  | Nieminuszczy et  al., 2019 |
| Hela EXD2 -/- + flag-EXD2 ND |  | Nieminuszczy et  al., 2019 |
| **Software and Algorithms** | | |
| Fiji | NIH |  |
| GraphPad Prism | GraphPad Software Inc. |  |
| **Other** | | |
| UV-C lamp | Vilber Lourmat | VL-115.c |
| Leica DM6000 microscope | Leica |  |
| Leica SP8 | Leica |  |
| Plan-Apochromat 40x/1.3 | Zeiss |  |
| Biotek Synergy HTX Multimode Reader | Bio-tek |  |
| Amersham Imager 600 | GE HealthCare |  |
| Sonicator Q800R | Qsonica |  |
