# Supplementary figures and images for: Stress-Induced Nuclear Import Governs Transcription Recovery after DNA Damage
Source: Research Square preprint supplement (doi:10.21203/rs.3.rs-7241921/v1), 2025-08-12

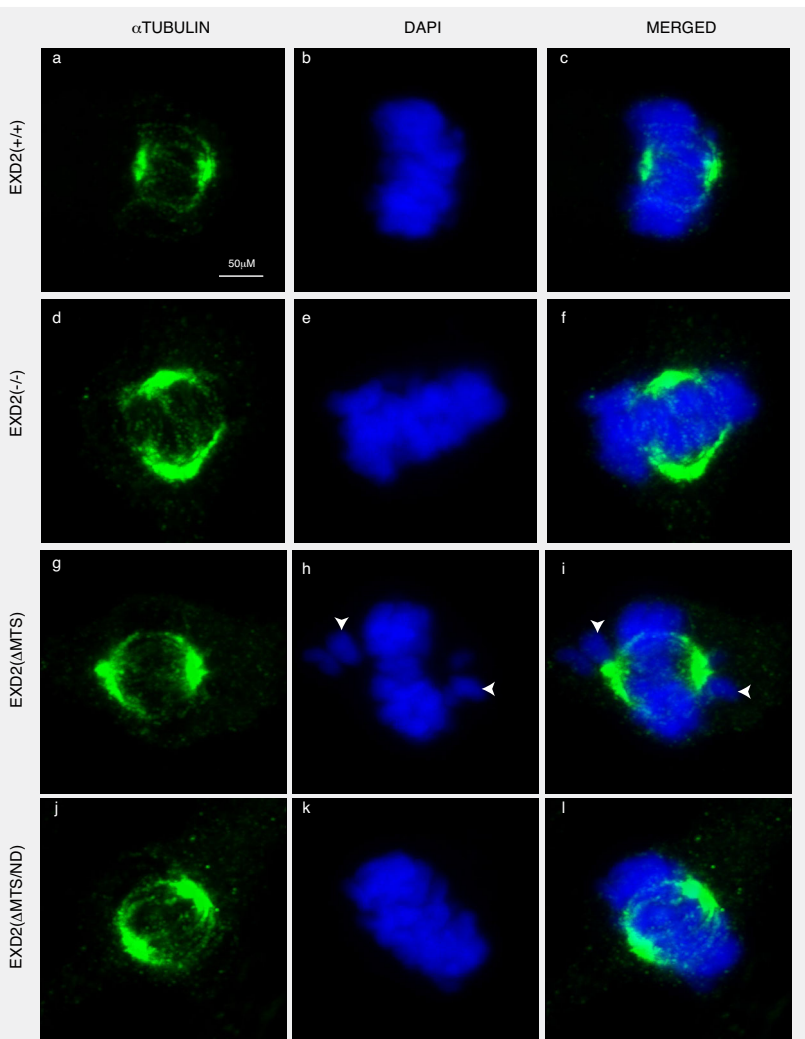

Supplement: Supplementary file 1 [file bdba242fb94952e1b970d265.pdf]
